# Supplementary material for: Inherited platelet diseases with normal platelet count: phenotypes, genotypes and diagnostic strategy
Source: PubMed Central journal article supplement — Haematologica. 2020 Nov 5;106(2):337–50. doi: 10.3324/haematol.2020.248153 (PMC7849565; doi:10.3324/haematol.2020.248153), 2020-11-05
Supplement: 2020-248153-NURDEN_SUPPL.pdf [file 2020-248153-NURDEN_SUPPL.pdf]

## Inherited platelet diseases with normal platelet count: phenotypes, genotypes and diagnostic strategy

Paquita Nurden,<sup>1</sup> Simon Stritt,<sup>2</sup> Remi Favier<sup>3</sup> and Alan T. Nurden<sup>1</sup>

<sup>1</sup>Institut Hospitalo-Universitaire LIRYC, Pessac, France; <sup>2</sup>Department of Immunology, Genetics and Pathology, Uppsala University, Uppsala, Sweden and <sup>3</sup>French National Reference Center for Inherited Platelet Disorders, Armand Trousseau Hospital, Assistance Publique-Hôpitaux de Paris, Paris, France

©2021 Ferrata Storti Foundation. This is an open-access paper. doi:10.3324/haematol.2020.248153

Received: June 13, 2020.

Accepted: August 12, 2020.

Pre-published: November 5, 2020.

Correspondence: *PAQUITA NURDEN* - paquita.nurden@gmail.com

---

Supplemental Table I: Inherited thrombocytopenia associated with function defects and/or granule abnormalities

| Disease, (protein)                                                         | Platelet volume | Gene, transmission                                                    | Function defects                                                                                           | $\alpha$ - and/or dense granules                                                      | References |
|----------------------------------------------------------------------------|-----------------|-----------------------------------------------------------------------|------------------------------------------------------------------------------------------------------------|---------------------------------------------------------------------------------------|------------|
| Bernard-Soulier syndrome (GPIb-IX-V)                                       | MTP             | <i>GPIBA, GPIBB, GP9</i><br>AR (biallelic)                            | Defect of platelet adhesion to VWF. Decreased aggregation with thrombin                                    | Normal                                                                                | 1          |
| Glanzman thrombasthenia – like syndrome with MTP ( $\alpha$ IIb $\beta$ 3) | MTP             | <i>ITGA2B, ITGB3</i><br>AD (monoallelic)                              | Decreased aggregation                                                                                      | Sometimes giant $\alpha$ -granules                                                    | 2-3        |
| FLNA-RD (FLNA1 – filamin A)                                                | MTP             | <i>FLNA</i><br>X-linked                                               | Loss-of-function but rare cases with gain-of-function mutations Adhesion and aggregation to collagen       | Presence of giant $\alpha$ -granules                                                  | 4-5        |
| Paris-Trousseau syndrome (FLI1 with ETS-binding domain)                    | MTP             | <i>FLI1</i><br>AD with hemizygosity for deletions at 11q23.3ter or AR | Platelet aggregation and secretion reduced for homozygous defect                                           | Giant fused $\alpha$ -granules                                                        | 6-7        |
| GATA1 (gene repressor; in complex with FOG)                                | MTP             | <i>GATA1</i><br>X-linked.                                             | Reduced function to ristocetin and/or collagen. Heterogeneity between patients                             | Absence of $\alpha$ -granules and/or dense granules<br>Heterogeneity between patients | 8          |
| GFI1B (gene repressor)                                                     | MTP             | <i>GFI1B</i><br>AD                                                    | Reduced function<br>Much heterogeneity between patients                                                    | Absence of $\alpha$ -granules and/or dense granules<br>Variability between patients   | 9          |
| RUNX1, (Runt family member)                                                | Normal          | <i>RUNX1</i><br>AD                                                    | Decreased aggregation in response to AA, epinephrine and collagen, absent second wave ADP                  | Dense granule and signaling defects                                                   | 10         |
| ETV6, (ETS family member; TEL oncogene)                                    | Normal          | <i>ETV6</i><br>AD                                                     | Abnormal platelet spreading on Fg surfaces and abnormal clot retraction, inconsistent abnormal aggregation | Normal                                                                                | 11         |
| IKZF5                                                                      | Normal          | <i>IKZF5(PEGASUS gene)</i><br>AD                                      | Inconstant defect of aggregation                                                                           | Fewer $\alpha$ - and dense granules.                                                  | 12         |
| Gray platelet syndrome (NBEAL2)                                            | MTP             | <i>NBEAL2</i><br>AR                                                   | Variably decreased responses to collagen and thrombin                                                      | Lack of $\alpha$ -granules.                                                           | 13,14      |
| Wiskott-Aldrich syndrome, (WASp, an adaptor and signaling protein)         | Small platelets | <i>WAS</i><br>X-linked                                                | Decreased aggregation in response to AA, epinephrine and collagen, absence second wave ADP                 | Possibly fewer granules                                                               | 15         |

|                                                                             |                 |                                                                                                       |                                                                                     |                                       |    |
|-----------------------------------------------------------------------------|-----------------|-------------------------------------------------------------------------------------------------------|-------------------------------------------------------------------------------------|---------------------------------------|----|
| (PTPRJ or CD148, a tyrosine phosphatase)                                    | Small platelets | <i>PTPRJ</i><br>AR                                                                                    | Decreased aggregation to collagen and to a lesser extent, TRAP. Impaired secretion. | No reports                            | 16 |
| (Src, a tyrosine kinase)                                                    | MTP             | <i>SRC</i> -gain-of-function missense mutation leading to upregulated tyrosine kinase activity.<br>AD | Delayed aggregation with collagen. Variable other defects                           | Possibly decreased $\alpha$ -granules | 17 |
| CARST.<br>(ADAP or SLAP-130, an adaptor protein)                            | Small platelets | <i>FYB</i><br>AR                                                                                      | Increased basal expression of P-selectin and reduced activation. Decreased adhesion | No reports                            | 18 |
| (G6b-B, regulator of platelet activation)                                   | MTP             | <i>G6B (MPIG6B)</i><br>AR                                                                             | Normal or minor aggregation defects. Normal adhesion                                | No reports                            | 19 |
| SLFN14<br>(endoribonuclease)                                                | MTP             | <i>SLFN14</i><br>AD                                                                                   | Decreased aggregation and secretion with ADP, collagen, TRAP, but normal with AA    | Reduced $\alpha$ - and dense granules | 20 |
| Stormorken or York platelet syndrome<br>( <i>STIM1</i> ; $Ca^{2+}$ -sensor) | MTP             | <i>STIM1</i><br>AD                                                                                    | Reduced thrombus formation, Abnormal PS expression and thrombin generation          | No reports                            | 21 |
| (Protein kinase A catalytic subunit)                                        | MTP             | <i>PRKACG</i><br>AR                                                                                   | Defect of platelet activation                                                       | No reports                            | 22 |
| THC2<br>( <i>ANKRD26</i> )                                                  | Normal volume   | <i>ANKRD26</i><br>AD                                                                                  | Limited defects                                                                     | Reduced platelet $\alpha$ -granules   | 23 |

RD, related-disease; AR, autosomal recessive; AD, autosomal dominant; MTP, macrothrombocytopenia; ADP, adenosine diphosphate; CARST, congenital autosomal recessive small platelet thrombocytopenia; AA, arachidonic acid; TRAP, thrombin receptor activating peptide.

## References

1. Andrews RK, Berndt MC. Bernard-Soulier syndrome: an update. *Semin Thromb Hemost* 2013;39(6):656-62.
2. Nurden P, Bordet JC, Pillois X, Nurden AT. An intracytoplasmic  $\beta 3$  Leu718 deletion in a patient with a novel platelet phenotype. *Blood Adv* 2017;1(8):494-499.
3. Favier M, Bordet JC, Favier R, et al. Mutations of the integrin  $\alpha$ IIb/ $\beta 3$  intracytoplasmic salt bridge cause macrothrombocytopenia and enlarged platelet  $\alpha$ -granules. *Am J Hematol* 2018;93(2):195-204.
4. Nurden P, Debili N, Coupry I, et al. Thrombocytopenia resulting from mutations in filamin A can be expressed as an isolated syndrome. *Blood* 2011;118(22):5928-5937.
5. Berrou E, Adam F, Lebret M, et al. Gain-of-Function Mutation in Filamin A Potentiates Platelet Integrin  $\alpha$ IIb $\beta 3$  Activation. *Arterioscler Thromb Vasc Biol* 2017;37(6):1087-1097.
6. Favier R, Raslova H. Progress in understanding the diagnosis and molecular genetics of macrothrombocytopenias. *Br J Haematol* 2015;170(5):626-639.
7. Stevenson WS, Rabbolini DJ, Beutler L, et al. Paris-Trousseau thrombocytopenia is phenocopied by the autosomal recessive inheritance of a DNA-binding domain mutation in FLI1. *Blood* 2015;126(17):2027-2030
8. Nichols KE, Crispino JD, Poncz M, et al. Familial dyserythropoietic anaemia and thrombocytopenia due to an inherited mutation in GATA1. *Nat Genet* 2000;24:266-270.

9. Van Oorschott R, Marneth AE, Bergevoet SM, et al. Inherited missense variants that affect GFI1B function do not necessarily cause bleeding diatheses. *Haematologica* 2019;104(6):e260-e264.
10. Morgan NV, Daly M. Gene of the issue: RUNX1 mutations and inherited bleeding. *Platelets* 2017;28(2):208-210.
11. Di Paola J, Porter CC. ETV6-related Thrombocytopenia and Leukemia Predisposition *Blood* 2019 ;134(8):663-667.
12. Lentaigne C, Greene D, Sivapalaratnam S, et al. Germline mutations in the transcription factor IKZF5 cause thrombocytopenia. *Blood* 2019;134(23):2070-2081.
13. Nurden P, Jandrot-Perrus M, Combrié R, et al. Severe deficiency of glycoprotein VI in a patient with gray platelet syndrome. *Blood* 2004;104(1):107-114.
14. Chen CH, Lo RW, Urban D, Pluthero FG, Kahr WH.  $\alpha$ -granule biogenesis: from disease to discovery. *Platelets* 2017; 28(2):147-154.
15. Mahlaoui N, Pellier I, Mignot C, et al. Characteristics and outcome of early-onset, severe forms of Wiskott-Aldrich syndrome. *Blood* 2013;121(9): 1510-1516.
16. Marconi C, Di Buduo CA, LeVine K, et al. Loss-of-function mutations in PTPRJ cause a new form of inherited thrombocytopenia. *Blood* 2019;133(12):1346-1357.
17. Turro E, Greene D, Wijgaerts A, et al. A dominant gain-of-function in universal tyrosine kinase SRC causes thrombocytopenia, myelofibrosis, bleeding and bone pathologies. *Sci Transl Med* 2016;8(328):328ra30.

18. Levin C, Koren A, Pretorius E, et al. Deleterious Mutation in the FYB Gene is Associated with congenital autosomal recessive small-platelet thrombocytopenia. *J Thromb Haemost* 2015;13(7):1285-1292.
19. Hofmann I, Geer MJ, Vögtle T, et al. Congenital macrothrombocytopenia with focal myelofibrosis due to mutations in human G6b-B is rescued in humanized mice. *Blood* 2018;132(13):1399-1412.
20. Fletcher SJ, Johnson B, Lowe GC, et al. SLFN14 mutations underlie thrombocytopenia with excessive bleeding and platelet secretion defects. *J Clin Invest* 2015;125(9):3600-3605.
21. Nesin V, Wiley G, Kousi M, et al. Activating mutations in STIM1 and ORAIL1 cause overlapping syndromes of tubular myopathy and congenital miosis. *Proc Natl Acad Sci USA* 2014;111(11):4197-4202.
22. Manchev VT, Hilpert M, Berrou E, et al. A new form of macrothrombocytopenia induced by a germline mutation in the PRKACG gene. *Blood* 2014;124(16):2554-2563.
23. Noris P, Perrotta S, Seri M, et al. Mutations in ANKRD26 are responsible for a frequent form of inherited thrombocytopenia: analysis of 78 patients from 21 families. *Blood* 2011;117(24):6673-6680.
