# Supplementary material for: Inherited platelet diseases with normal platelet count: phenotypes, genotypes and diagnostic strategy
Source: PubMed Central journal article supplement — Haematologica. 2020 Nov 5;106(2):337–50. doi: 10.3324/haematol.2020.248153 (PMC7849565; doi:10.3324/haematol.2020.248153), 2020-11-05
Supplement: 2020_248153-Disclosures_Contributions.pdf [file 2020_248153-Disclosures_Contributions.pdf]

Haematologica  
HAEMATOL/2020/248153  
Version 3

Inherited platelet diseases with normal platelet count: phenotypes,  
genotypes and diagnostic strategy

Paquita Nurden, Simon Stritt, Remi Favier, and Alan T. Nurden

Disclosures: Neither of the authors have a conflict of interest to report or a financial disclosure to make.

Contributions: All the authors participate in the manuscript preparation. PN, ATN supervised the writing of the text.
